# Supplementary material for: Role of tyramine in calcium dynamics of GABAergic neurons and escape behavior in Caenorhabditis elegans
Source: PubMed Central journal article supplement (PMC6062986; doi:10.1186/s40851-018-0103-1), 2018-07-26
Supplement: 40851_2018_103_MOESM1_ESM.pdf [file 40851_2018_103_MOESM1_ESM.pdf]

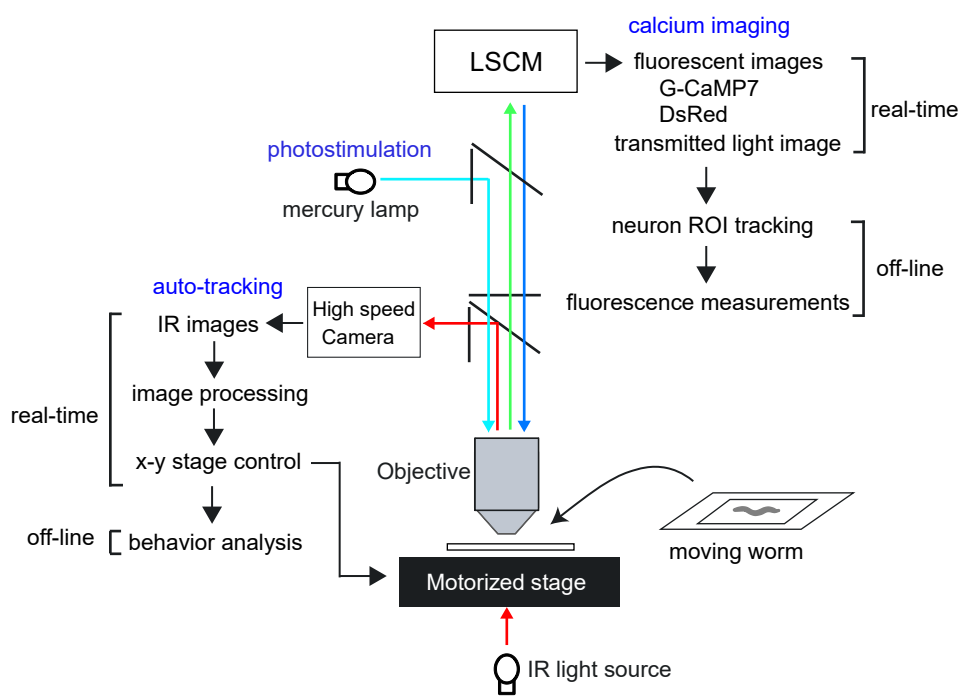

IR: infrared  
 LSCM: laser-scanning confocal microscope

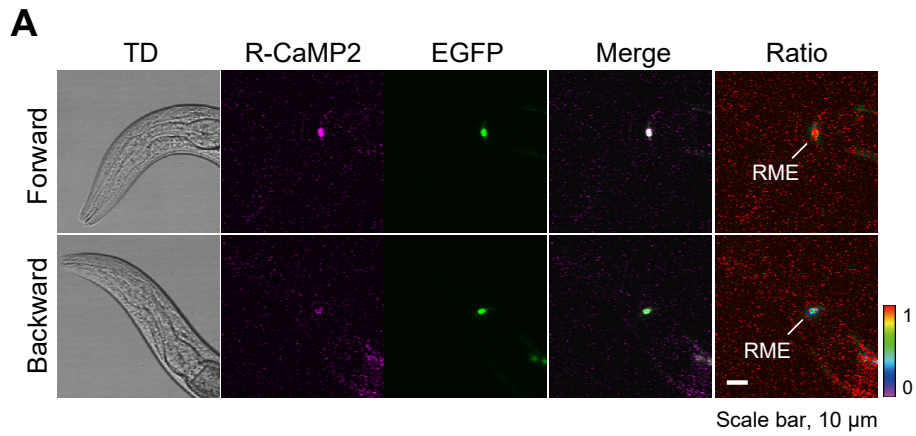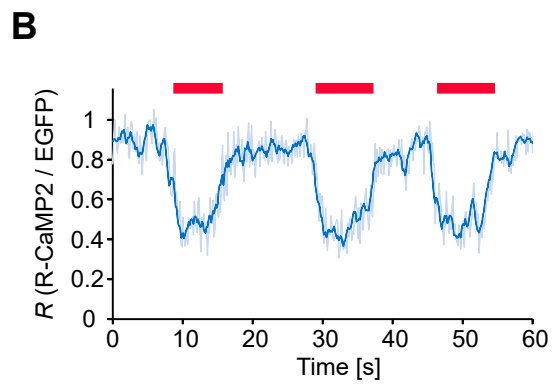

backward locomotion  
 raw data of  $R$   
 moving averages of  $R$  across a 0.54 s window

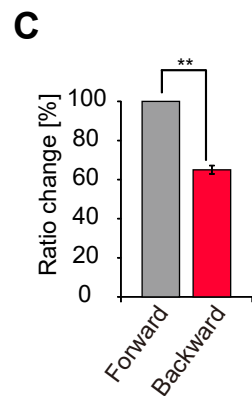

$n = 11$  from seven animals

\*\* $P < 0.01$ , Student' s two-tailed t-test.

Error bars, SEM.

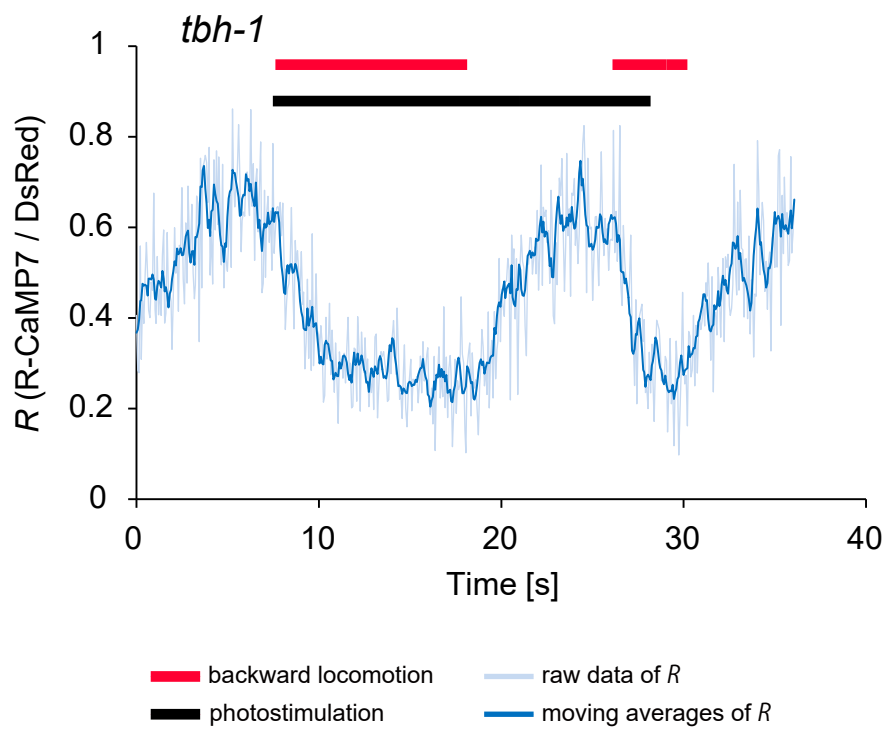

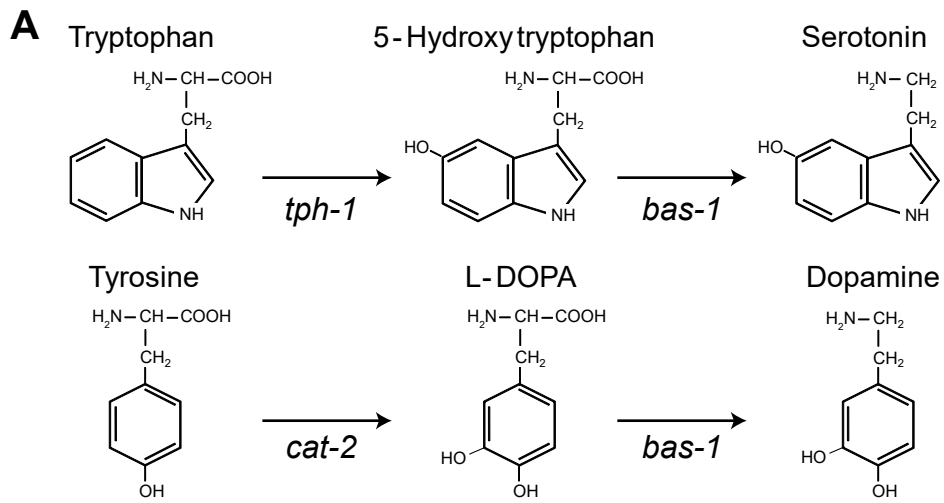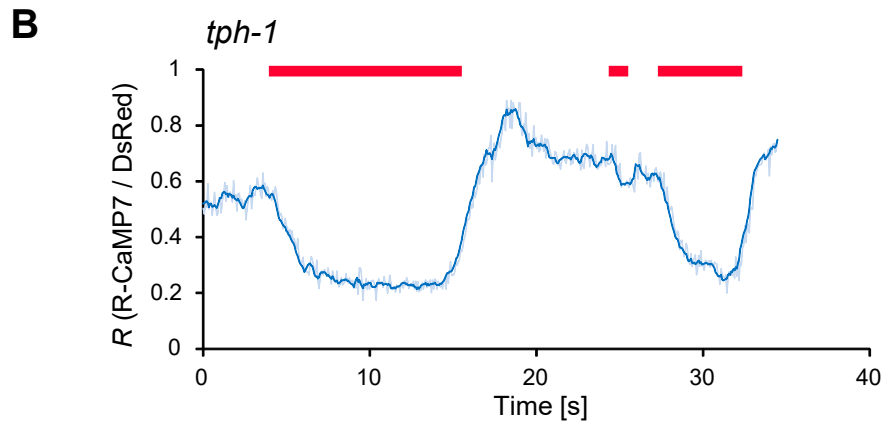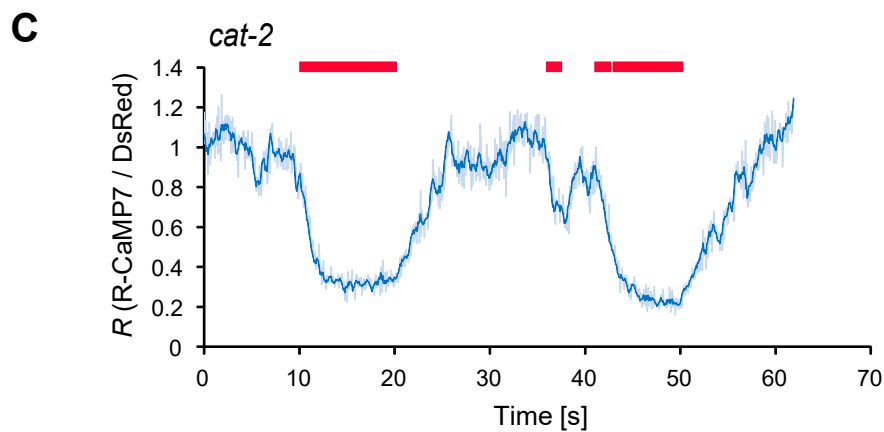

█ backward locomotion  
— raw data of  $R$   
— moving averages of  $R$

**Table S1 C. elegans strains used in this study**

| Strain  | Genotype                                | Reference or Source                                                    |
|---------|-----------------------------------------|------------------------------------------------------------------------|
| N2      | wild type                               | Brenner, Genetics, 1974                                                |
| RB993   | <i>tdc-1 (ok914) II</i>                 | The C. elegans Deletion Mutant Consortium, G3, 2012. OMRF <sup>a</sup> |
| RB1161  | <i>tbh-1 (ok1196) X</i>                 | The C. elegans Deletion Mutant Consortium, G3, 2012. OMRF <sup>a</sup> |
| RB1690  | <i>ser-2 (ok2103) X</i>                 | The C. elegans Deletion Mutant Consortium, G3, 2012. OMRF <sup>a</sup> |
| VC125   | <i>tyra-3 (ok325) X</i>                 | The C. elegans Deletion Mutant Consortium, G3, 2012. OMRF <sup>a</sup> |
| GR1321  | <i>tph-1 (mg280) cam-1(vs166) II</i>    | Sze JY et al., Nature, 2000                                            |
| MT14680 | <i>lgc-55 (n4331) V</i>                 | Ringstad N et al., Science, 2009                                       |
| QJ6     | <i>cat-2 (jq6) II</i>                   | Usami A, Ph.D. Thesis, 2012                                            |
| QJ3063  | <i>jqIs6</i>                            | This study                                                             |
| QJ3064  | <i>jqIs71</i>                           | This study                                                             |
| QJ3065  | <i>jqIs72</i>                           | This study                                                             |
| QJ3067  | <i>jqIs75</i>                           | This study                                                             |
| QJ1412  | <i>jqEx439</i>                          | This study                                                             |
| QJ4110  | <i>tph-1 (mg280) II; jqIs6</i>          | This study                                                             |
| QJ4111  | <i>cat-2 (jq6) II; jqIs6</i>            | This study                                                             |
| QJ1359  | <i>ser-2 (ok2103) X; jqEx386</i>        | This study                                                             |
| QJ1501  | <i>ser-2 (ok2103) X; jqEx528</i>        | This study                                                             |
| QJ1502  | <i>ser-2 (ok2103) X; jqEx529</i>        | This study                                                             |
| QJ1526  | <i>ser-2 (ok2103) X; jqEx553</i>        | This study                                                             |
| QJ1543  | <i>ser-2 (ok2103) X; jqEx570</i>        | This study                                                             |
| QJ1544  | <i>ser-2 (ok2103) X; jqEx571</i>        | This study                                                             |
| QJ4113  | <i>jqIs73; jqIs75</i>                   | This study                                                             |
| QJ4114  | <i>jqIs6; jqEx318</i>                   | This study                                                             |
| QJ1489  | <i>jqIs75; jqEx516</i>                  | This study                                                             |
| QJ4116  | <i>tdc-1 (ok914) II; jqIs6; jqEx318</i> | This study                                                             |
| QJ4117  | <i>tbh-1 (ok1196) X; jqIs6; jqEx318</i> | This study                                                             |
| QJ4118  | <i>ser-2 (ok2103) X; jqIs6; jqEx318</i> | This study                                                             |
| QJ4119  | <i>lgc-55 (n4331) V; jqIs6; jqEx318</i> | This study                                                             |
| QJ4120  | <i>tyra-3 (ok325) X; jqIs6; jqEx318</i> | This study                                                             |
| QJ4122  | <i>ser-2 (ok2103) X; jqIs6; jqEx386</i> | This study                                                             |
| QJ4123  | <i>ser-2 (ok2103) X; jqIs6; jqEx422</i> | This study                                                             |
| QJ4112  | <i>ser-2 (ok2103) X; jqIs6; jqEx528</i> | This study                                                             |

<sup>a</sup>OMRF: Oklahoma Medical Research Foundation, The *C. elegans* Deletion Mutant Consortium

**Table S2 Transgenic lines generated in this study**

| Transgenic array | DNA injected                                                                                                                                         |
|------------------|------------------------------------------------------------------------------------------------------------------------------------------------------|
| <i>jqIs6</i>     | <i>Punc-25::G-CaMP7</i> (100 ng/μl)<br><i>Punc-25::DsRedx</i> (50 ng/μl)                                                                             |
| <i>jqIs71</i>    | <i>Punc-25::G-CaMP7 (ce)</i> (50 ng/μl)<br><i>Punc-25::DsRedx</i> (50 ng/μl)<br><i>pBluescript II SK+</i> (100 ng/μl)                                |
| <i>jqIs72</i>    | <i>Punc-25::G-CaMP7(ce)</i> (50 ng/μl)<br><i>Punc-25::DsRedx</i> (50 ng/μl)<br><i>pBluescript II SK+</i> (100 ng/μl)                                 |
| <i>jqIs73</i>    | <i>Punc-25::G-CaMP7(ce)</i> (50 ng/μl)<br><i>Punc-25::DsRedx</i> (50 ng/μl)<br><i>pBluescript II SK+</i> (100 ng/μl)                                 |
| <i>jqIs75</i>    | <i>Ptdc-1::G-CaMP7(ce)</i> (50 ng/μl)<br><i>Ptdc-1::DsRedx</i> (50 ng/μl)<br><i>Ptbh-1::EBFP2</i> (50 ng/μl)<br><i>pBluescript II SK+</i> (50 ng/μl) |
| <i>jqEx318</i>   | <i>Psra-6::ChR2::mCherry</i> (100 ng/μl)<br><i>Punc-122::mCherry</i> (50 ng/μl)<br><i>pBluescript II SK+</i> (50 ng/μl)                              |
| <i>jqEx386</i>   | <i>Punc-25::ser-2 (+)</i> (20 ng/μl)<br><i>Punc-122::EYFP</i> (50 ng/μl)<br><i>pBluescript II SK+</i> (130 ng/μl)                                    |
| <i>jqEx422</i>   | <i>Punc-17::ser-2 (+)</i> (20 ng/μl)<br><i>Punc-122::EYFP</i> (50 ng/μl)<br><i>pBluescript II SK+</i> (130 ng/μl)                                    |
| <i>jqEx439</i>   | <i>Punc-25::R-CaMP2</i> (50 ng/μl)<br><i>Punc-47::EGFP</i> (50 ng/μl)<br><i>pBluescript</i> (50 ng/μl)                                               |
| <i>jqEx516</i>   | <i>Punc-47::EGFP</i> (50 ng/μl)<br><i>pBluescript II SK+</i> (150 ng/μl)                                                                             |
| <i>jqEx528</i>   | <i>Pser-2prom2::ser-2 (+)</i> (20 ng/μl)<br><i>Punc-122::EYFP</i> (50 ng/μl)<br><i>pBluescript II SK+</i> (130 ng/μl)                                |
| <i>jqEx529</i>   | <i>Pser-2prom2::ser-2 (+)</i> (20 ng/μl)<br><i>Punc-122::EYFP</i> (50 ng/μl)<br><i>pBluescript II SK+</i> (130 ng/μl)                                |
| <i>jqEx553</i>   | <i>Punc-25::ser-2 (+)</i> (20 ng/μl)<br><i>Punc-122::EYFP</i> (50 ng/μl)<br><i>pBluescript II SK+</i> (110 ng/μl)                                    |
| <i>jqEx570</i>   | <i>Punc-30::ser-2 (+)</i> (20 ng/μl)<br><i>Punc-122::EYFP</i> (50 ng/μl)<br><i>pBluescript II SK+</i> (130 ng/μl)                                    |
| <i>jqEx571</i>   | <i>Punc-30::ser-2 (+)</i> (20 ng/μl)<br><i>Punc-122::EYFP</i> (50 ng/μl)<br><i>pBluescript II SK+</i> (130 ng/μl)                                    |

**Table S3 Mutations and primers for genotyping**

| Genotype                | Mutation                       | Primer name           | Sequence                  |
|-------------------------|--------------------------------|-----------------------|---------------------------|
| <i>cat-2 (jq6) II</i>   | 320bp deletion + 9bp insertion | cat-2_jq6_forward     | CTTCACACGACGTGCTCCTA      |
|                         |                                | cat-2_jq6_reverse1    | GTTGTCTGGAAGACCCGAAA      |
|                         |                                | cat-2_jq6_reverse2    | CTTGAACTCTAACGCCTGATC     |
| <i>lgc-55 (n4331) V</i> | 1986bp deletion                | lgc-55_n4331_forward  | CGGTGGTCAGTGGATAATTTTGTGC |
|                         |                                | lgc-55_n4331_reverse1 | GCGATTTGTGAATTGCAGAGCC    |
|                         |                                | lgc-55_n4331_reverse2 | CGTCATCTATGAATTCGACCGTTG  |
| <i>ser-2 (ok2103) X</i> | 2043bp deletion                | ser-2_ok2103_forward1 | GTGATGGTACAAGCTTCACC      |
|                         |                                | ser-2_ok2103_reverse1 | CTTCGTCATTTGTGGTTTCG      |
|                         |                                | ser-2_ok2103_forward2 | CTCCATCATATTCTCCTGCC      |
| <i>tbh-1 (ok1196) X</i> | 981bp deletion                 | tbh-1_ok1196_forward  | GGAAAGGACAATGGCACGTTGA    |
|                         |                                | tbh-1_ok1196_reverse1 | AGGTGCTGAATTTGCCTGCC      |
|                         |                                | tbh-1_ok1196_reverse2 | CGAAGGTCCAAGTATCAGCCAA    |
| <i>tdc-1 (ok914) II</i> | 629bp deletion                 | tdc-1_ok914_forward   | GCTATGGCTTCATGTTGATGCTGC  |
|                         |                                | tdc-1_ok914_reverse1  | GCCGTTATCAAAGGCGGAAACT    |
|                         |                                | tdc-1_ok914_reverse2  | GCACATACACAGAAGCGGATCAC   |
| <i>tph-1 (mg280) II</i> | 1305bp deletion                | tph-1_mg280_forward   | GCAAAGACCCCTCTCAACCTCATT  |
|                         |                                | tph-1_mg280_reverse1  | GGAAACCATTGAGAACCGTTGTC   |
|                         |                                | tph-1_mg280_reverse2  | GCATGATGGCGAACGTATTGAGTG  |
| <i>tyra-3 (ok325) X</i> | 781bp deletion                 | tyra-3_ok325_forward1 | GTTCTGAAACAGTTCACGGG      |
|                         |                                | tyra-3_ok325_forward2 | GATTGCCTCATGAGAGCTTC      |
|                         |                                | tyra-3_ok325_reverse1 | GGAGAAGAGTCCGTTTATCG      |

**Table S4 Primers for molecular biology**

| No. | primer name           | Sequence                                    | Comments                                                                                   |
|-----|-----------------------|---------------------------------------------|--------------------------------------------------------------------------------------------|
| 1   | G-CaMP7(CE)_NheI#F1   | CTTACTAGTGCTAGCATGAGAGGAAGTCATCA<br>TCA     | 1 and 2 were used to amplify the 1.4 kb codon-optimized G-CaMP7 cDNA for <i>C. elegans</i> |
| 2   | G-CaMP7(CE)_NheI#R1   | TTTTTTTTGCTAGCTTATTGGCAGTCATCATC<br>T       |                                                                                            |
| 3   | R-CaMP2_Bgl#R1        | TTTGTAGATCTCTATGGGTTGGACTCCACGT             | 3 and 4 were used to amplify the 1.5 kb R-CaMP2 cDNA                                       |
| 4   | R-CaMP2_Not#F1        | CTTACTAGTGCGGCCGCATGGGTTCTCATCAT<br>CATCATC |                                                                                            |
| 5   | DsRedx_NheI#F1        | CTTACTAGTGCTAGCATGGCTCCTCCGAGGA<br>CGT      | 5 and 6 were used to amplify the 0.68 kb DsRed-Express-1 cDNA                              |
| 6   | DsRedx_NheI#R1        | TTTTTTTTGCTAGCCTACAGGAACAGGTGGTG<br>GC      |                                                                                            |
| 7   | ser-2 cDNA Bgl#R1     | TTTGTAGATCTCTAAGGTTGCGCACTCATTC             | 7 and 8 were used to amplify the 1.3 kb full-length <i>ser-2</i> cDNA                      |
| 8   | ser-2 cDNA Not#F1     | CTTACTAGTGCGGCCGCATGTTCCGAAATTAC<br>ACTGA   |                                                                                            |
| 9   | ser-2prom2#F1         | ATTGGCTGCAGATTTTATGACTTTCACTAGAA<br>ATG     | 9 and 10 were used to amplify the 4.7 kb <i>ser-2prom2</i> promoter                        |
| 10  | ser-2prom2#R1         | AGCTGGATCCTTTTGCAAATACTTGAGGCTG             |                                                                                            |
| 11  | tbh-1 promoter#F1_Bam | AGCTGGATCCCCTTATGTATCTCATTGCTATTT           | 11 and 12 were used to amplify the 2.8 kb <i>tbh-1</i> promoter                            |
| 12  | tbh-1 promoter#R1_Not | CTTACTAGTGCGGCCGCTTCTGAAATCGTAT<br>AGTAATGG |                                                                                            |
| 13  | tdc-1p_BamHI#R1       | AGCTGGATCCTTGGGCGTCTGAAAAATG                | 13 and 14 were used to amplify the 4.4 kb <i>tdc-1</i> promoter                            |
| 14  | tdc-1p_HindIII#F1     | TTTTTTTTAAGCTTAAGGGAGAGAGATTGCA<br>GTGG     |                                                                                            |
| 15  | unc-25p_BamHI#R1      | AGCTGGATCCTCTTTTTGGCGGTGAACTG               | 15 and 16 were used to amplify the 1.9 kb <i>unc-25</i> promoter                           |
| 16  | unc-25p_HindIII#F1    | TTTTTTTTAAGCTTTGTGCATGCAAAAAACACC<br>C      |                                                                                            |
| 17  | unc-30_SphI#F1        | TTTTTTTTGCATGCTCGATGACACTTTTGTATG<br>TGT    | 17 and 18 were used to amplify the 2.4 kb <i>unc-30</i> promoter                           |
| 18  | unc-30_BamHI#R1       | AGCTGGATCCGTGTTGATCTTTGCCGGAG               |                                                                                            |
| 19  | unc-54 3'#R1          | GACTTAGAAGTCAGAGGCAC                        | 19-25 were used to verify the sequences of DNA constructs                                  |
| 20  | unc-86_UTR#R1         | CAAAGCGAATTGCTAAACCC                        |                                                                                            |
| 21  | pFX#F1                | GCAAGGCGATTAAGTTGGGT                        |                                                                                            |
| 22  | pPD49.26#F1           | CGTTGGCCGATTCATTAATG                        |                                                                                            |
| 23  | ser-2#R2              | GTAGACAACCCGCAACTATC                        |                                                                                            |
| 24  | ser-2 cDNA #F2        | CATTGGGATTATAGTCACGC                        |                                                                                            |
| 25  | unc-25p#F1            | CGGAATAGGGAAAAGCTCAG                        |                                                                                            |
